1           **RECRUITMENT OF GROUPE BROODSTOCK ON THE BASIS OF SINGLE**  
2                                       **LOCUS DNA MARKERS**

3  
4  
5  
6  
7  
8  
9  
10  
11  
12  
13  
14  
15  
16  
17  
18  
19  
20  
21  
22  
23  
24  
25

Kenneth F. RODRIGUES <sup>1\*</sup>, Ahmad Z. TANI<sup>1</sup>, Syarul N. BAHARUM<sup>2</sup>

<sup>1</sup>*Biotechnology Research Institute, Universiti Malaysia Sabah, Kota Kinabalu, Sabah, Malaysia*

<sup>2</sup>*Institute of Systems Biology, Universiti Kebangsaan Malaysia, 43600 UKM Bangi, Selangor Malaysia*

\*Correspondence: Kenneth Francis Rodrigues, Biotechnology Research Institute, Universiti Malaysia Sabah, 88400, Kota Kinabalu, Sabah, Malaysia. Phone: +6088320000-5599, Fax: +6088320993, e-mail: [kennethr@ums.edu.my](mailto:kennethr@ums.edu.my)

26 **Abstract**

27

28 Scientific breeding programs are founded on the screening and recruitment of genetically  
29 diverse broodstock, with the ultimate aim of developing heterogeneous breeding populations  
30 that host a collection of desirable traits. Single locus DNA markers can be applied to facilitate  
31 the process of selection as they are species specific, reliable, reproducible and easy to use.  
32 This study set forth to develop a library of single locus DNA markers for two commercially  
33 cultured species of groupers, *Epinephelus fuscoguttatus* and *E. corallicola*. DNA was  
34 isolated from one representative specimen of each species and utilized to construct shotgun  
35 genomic libraries. DNA sequences derived from the library were selected for the  
36 development of 42 and 41 single locus DNA markers for *E. fuscoguttatus* and *E. corallicola*  
37 respectively. The markers were then tested against randomly selected specimens obtained  
38 from the wild. Genotyping results revealed that the species specific primers demonstrated the  
39 ability to distinguish between individuals from the same species into distinct operational  
40 taxonomic units (OTUs) on the basis of their differential DNA profiles, thus establishing a  
41 basis for selection based on genetic heterogeneity. The findings of this study present a strong  
42 case for the application of single locus DNA markers as molecular tools for the selection of  
43 broodstock on the basis of genotyping.

44

45

46

47

48

49

50 **Keywords:** Grouper, *Epinephelus fuscoguttatus*, *E. corallicola*, Single locus DNA markers.

## 51 1.0 INTRODUCTION

52 The economic success of the aquaculture industry is founded on the selection and recruitment  
53 of high quality broodstock from genetically diverse wild populations. However, the process  
54 of selection of wild specimens is confounded by phenotypical similarity and paucity of  
55 genetic information. Genomic molecular markers [1] have the potential to revolutionize the  
56 aquaculture industry when applied in conjunction with conventional breeding techniques [2].  
57 This has formed the basis for approaches that recruit broodstock and seed on the basis of data  
58 obtained from Quantitative Trait Loci (QTLs) [3] and Marker Assisted Selection (MAS) [4].  
59 These two molecular approaches can have a significant impact on the economics of a fish  
60 breeding operation as they offer an avenue for the elimination of genetically inferior  
61 germplasm prior to recruitment. Scientists have initiated the process of marker development  
62 for finfish by focusing on several commercially exploited species such as *Oreochromis*  
63 *niloticus* [5], *Ictalurus punctatus* [6], *Salmo salar* [7] and *Cyprinus carpio* [8]. They have  
64 relied on an assortment of molecular markers such as microsatellites [9], Single Nucleotide  
65 Polymorphisms (SNPs) [10], Amplified Fragment Length Polymorphisms [11] and Short  
66 Sequence Repeats [12] in order to detect genetic polymorphisms that can be exploited by  
67 breeders. The practical application of molecular markers to breeding has been discussed in  
68 detail [13] and it is interesting to note that highly informative markers such as microsatellites  
69 and SNPs require specialized laboratories and analytical techniques, thus putting them  
70 beyond the technological reach of commercial breeders. Single locus DNA markers [14] are  
71 less informative than microsatellites and SNPs, however they make up for this shortcoming  
72 by their simplicity, reproducibility and ability to distinguish individuals within a population.  
73 This study set forth to develop single locus DNA markers could be applied for the selection  
74 of broodstock purely on the basis of Boolean DNA profiling. The groupers *E. fuscoguttatus*

75 and *E. corallicola* were selected as the target species as they are commercially exploited by  
76 the aquaculture industry.

77

## 78 **2.0 MATERIAL AND METHODS**

### 79 2.1 Sample collection and DNA isolation

80 The samples for this study were all collected from broodstock being maintained at the Borneo  
81 Marine Research Institute, Universiti Malaysia Sabah. DNA was extracted from Fin clips  
82 collected from *E. fuscoguttatus* (12) and *E. corallicola* (10) using the DNeasy extraction kit  
83 (Qiagen), the concentration of DNA was assessed using a micro-volume UV-Vis  
84 Spectrophotometer (GE Healthcare Life Sciences) and the final concentration was adjusted to  
85 50 ng/μl using sterile nuclease free water. DNA samples were stored at -80° C.

86

### 87 2.2 Construction of genomic libraries

88 Partial small insert genomic libraries [15] were constructed using one DNA sample derived  
89 from each of the two species of groupers, *E. fuscoguttatus* and *E. corallicola*. Restriction  
90 digests were carried out using a combination of six restriction enzymes, *EcoRI/HindIII*,  
91 *EcoRI/BamHI*, *BamHI/HindIII*, *KpnI/SalI*, *SacI/KpnI* and *SacI/XbaI*. (New England Biolabs),  
92 following which the digested DNA was ligated onto a pUC19 Vector and transformed into  
93 chemically competent *Escherichia coli* (TOP10). Recombinant clones from each library were  
94 selected randomly from Luria–Bertani plates containing Ampicillin (100 mg/l) and X-Gal (50  
95 mg/l). Plasmid DNA were extracted and purified using GeneJET plasmid purification kit  
96 (Fermentas) and sequenced using BigDye Terminator 2.0 Cycle Sequencing Ready Reaction  
97 Kit (Life Technologies, USA) on an ABI Prism 3770 automated DNA sequencer (Applied  
98 Biosystems). Sequences were deposited at the NCBI GenBank and assigned accession  
99 numbers (Tables 1.0 and 3.0).

100

### 101 2.3 Primer design

102 One pair of primers was designed per individual DNA sequence using the online Primer3  
103 software [16]. The annealing temperature was set ( $T_a$ ) at 60 °C and regions with potential  
104 secondary structures, high G: C ratio and runs of a single nucleotide, were excluded. PCR  
105 grade primers were synthesized (IDT Technologies, Singapore).

106

### 107 2.4 Genotyping

108 PCR amplification was performed in final volume of 20  $\mu$ l containing 1.2  $\mu$ l  $MgCl_2$   
109 (1.5mM), 0.4  $\mu$ l dNTPs (0.2mM each), 4  $\mu$ l 1x *GoTaq* buffer (Promega), 1 U *Taq* DNA  
110 polymerase (Promega), 1 $\mu$ l of each primer (5 $\mu$ M), 2 $\mu$ l template DNA and nuclease free  
111 water. Amplification was performed using a thermal cycler (MJ research, PTC-200) under  
112 the following conditions: pre-denaturation at 95°C for 3 min, followed by 30 cycles of  
113 denaturation (30 sec at 95°C), annealing (40 sec at 58°C), extension (2 min at 72°C) and final  
114 extension (10 min at 72°C). PCR products were resolved by electrophoresis on a 1.5% Tris-  
115 Boric Acid EDTA agarose gel, stained with Ethidium bromide and the gel was analyzed  
116 using a gel documentation system (Alpha Innotech, San Leandro, CA).

117

### 118 2.5 Scoring of PCR amplicons and data analysis

119 PCR amplicons were resolved on a 1.5% Tris – Boric Acid – EDTA (TBE) agarose gel,  
120 stained in a solution of Ethidium Bromide (50  $\mu$ g/ml) for 10 min following which the gels  
121 were viewed using a UV transilluminator (Alpha Innotech, USA). Bands were scored as “1”  
122 for present and “0” for absent resulting in a binary score matrix. To test the reproducibility of  
123 the amplification pattern the PCR was repeated at least twice. Only unambiguous and clear  
124 amplicons were scored and chosen for Jaccard's similarity coefficient analysis. The UPGMA

125 phenogram was constructed using the online software DendroUPGMA  
126 (<http://genomes.urv.cat/UPGMA/>) [17]. Distance and Similarity matrices were computed  
127 based on the Dice Coefficient with 100 replicates. Operational Taxonomic Units (OTUs)  
128 were determined on the basis of the Cophenetic Correlation Coefficient (CPCC) [18] and  
129 phenograms were rendered graphically using the online software PhyloWidget  
130 (<http://www.phylowidget.org/>) [19].

131

### 132 **3.0 RESULTS**

#### 133 3.1 Single Locus DNA Markers for *E. fuscoguttatus*

134 Six genomic libraries yielded 341 clones of which 68 were randomly selected for sequencing.  
135 Primers were designed to amplify 42 loci (Table 1.0). 37 primers yielded single amplicons  
136 whereas the remaining 5 primers (EFJ006, EFJ018, EFP010, EFJAAC2 and EFP003)  
137 amplified more than one locus. The total number of polymorphic loci was 21 (Table 2.0). The  
138 phenogram of *E. fuscoguttatus* graphically depicts the OTUs (Figure 1.0). The individuals  
139 clustered into three major clades. Clade 1 consisted of OTUs EF001, EF006, EF008, EF005,  
140 EF004 and EF010. Clade 2 consisted of OTUs EF002, EF009, EF03X, EF02X and EF003  
141 and Clade 3 contained one OTU EF007. Within clade 1, OTUs EF001 and EF006 were  
142 grouped together with a similarity of 96%. Both of these OTUs were connected to 4 nodes  
143 containing 4 different OTUs namely; EF008, EF005, EF004 and EF010. OTU EF006  
144 indicating highly a higher degree of similarity to two inter-joining nodes containing OTUs  
145 EF008 and EF005 with a similarity of 96% and 95% respectively. OTU EF005 was highly  
146 similar to OTU EF004 with 93% similarity. Within clade 2, OTUs EF009 and EF03X  
147 clustered with a similarity of 97%. Both OTUs were connected with three other nodes. OTU  
148 EF009 was 95% similar to OTUs EF02X, EF002 and EF003. Clade 3 was represented by  
149 only one individual OTU EGF007.

150

### 151 3.2 Single Locus DNA Markers for *E. corallicola*

152 Six genomic libraries yielded 220 clones of which 52 were randomly selected for sequencing.

153 Primers were designed to amplify 41 loci (Table 3.0) which yielded single amplicons (Table

154 4.0). The phenogram of *E. corallicola* graphically depicts the OTUs (Figure 2.0). The

155 phenogram depicts three major clades. Clade 1 was composed of OTUs CC001, CC009,

156 CC006 and CC008. Clade 2 comprised OTUs CC003, CC004, CC002, CC010, CC007 and

157 CC005. In clade 1, OTUs CC001 and CC009 exhibited 81% similarity. Both OTUs were

158 linked to another set of 2 nodes containing 2 different OTUs namely; CC006 and CC008.

159

## 160 **4.0 DISCUSSION**

### 161 4.1 Single Locus DNA Markers for *E. fuscoguttatus*

162 The tiger grouper, *E. fuscoguttatus* is highly sought after by fish breeders as it adapts well to

163 commercial aquaculture and mariculture systems. The genetic profile indicated a high degree

164 of similarity with 31 primers amplifying consistently across the 12 samples and 15 primers

165 exhibiting differential profiles. This implies that the breeding population is not as genetically

166 diverse as compared to *E. corallicola* and may require the acquisition and screening of

167 additional recruits from the wild. Earlier reports [20] based on genotyping using

168 microsatellites have arrived at similar conclusions regarding the abundance and diversity of

169 wild populations of *E. fuscoguttatus*. Single locus DNA markers can be tested for Mendelian

170 inheritance and applied for marker assisted selection of intraspecific grouper hybrids.

171

### 172 4.2 Single Locus DNA Markers for *E. corallicola*

173 These are the first reported genomic molecular markers for *E. corallicola*. The amplification

174 profiles revealed a high level of intraspecific genetic diversity as the ten individuals tested

175 exhibited unique genetic fingerprints implying that the wild population is genetically diverse.  
176 A similar study conducted using microsatellites in a closely related species *Plectropomus*  
177 *maculatus* led to the discovery of highly polymorphic loci which have potential applications  
178 in broodstock management [21]. Single locus DNA markers can be applied to develop  
179 linkage maps as in the case of *E. aeneus* where 222 microsatellite loci were utilized to  
180 construct a linkage map representing 24 chromosomes [22]. Advances in next generation  
181 DNA sequencing technologies have led to the development of novel markers such as SNPs as  
182 reported in *E. coioides* [23] and microsatellites with intra specific applications [24]. The  
183 development of a database of markers is essential for the development of management  
184 strategies, however markers which require extensive technical expertise and complex analysis  
185 will not be relevant to aquaculture as there is no cost benefit advantage. Under these  
186 circumstances single locus markers offer an economical alternative to SNPs.

187

188

#### 189 4.3 Implications for broodstock management

190 Grouper breeders rely on wild germplasm in order to develop inbred lines. The selection of  
191 seed is done on a random basis and not on the basis of genetic diversity. There are two  
192 primary reasons for this, the first is the lack of suitable species specific markers for genetic  
193 profiling and the second is the lack of technical expertise to interpret the data derived from  
194 highly informative microsatellite DNA loci and SNPs. The objective of this study was to  
195 develop molecular markers which could be applied for diagnostic testing in a simple  
196 laboratory setup comprising a thermal cycler, gel electrophoresis system and imaging systems  
197 which are can be accessed by fish breeders. The markers which have been developed can be  
198 scored directly purely on the basis of amplification or non-amplification. Previous studies  
199 [25] that have attempted to develop molecular markers for groupers have utilized Random



200 Amplified Polymorphic DNA (RAPD) which are difficult to reproduce due to the low degree  
201 of species specificity and high number of PCR artefacts. Furthermore, the ability of the  
202 markers to resolve intraspecific genetic polymorphism makes them ideal for population  
203 diversity studies and the construction of linkage maps for mapping quantitative traits.

204

205

206

207

## 208 **5.0 Conclusion**

209 This study demonstrated that species specific single locus DNA markers can be applied for  
210 the genotyping of groupers recruited from the wild for the purpose of breeding. We  
211 developed 42 and 41 novel species specific DNA markers for *E. fuscoguttatus* and *E.*  
212 *corallicola* respectively and applied them to resolve intraspecific diversity. These markers  
213 will be of assistance to fish breeders during the process of broodstock selection and will  
214 facilitate the process of developing genetically diverse breeding populations.

215

216

## 217 **Acknowledgements**

218 This study was funded by the Ministry of Agriculture, Government of Malaysia, Grant  
219 Number SCF-2010-SF1010

220

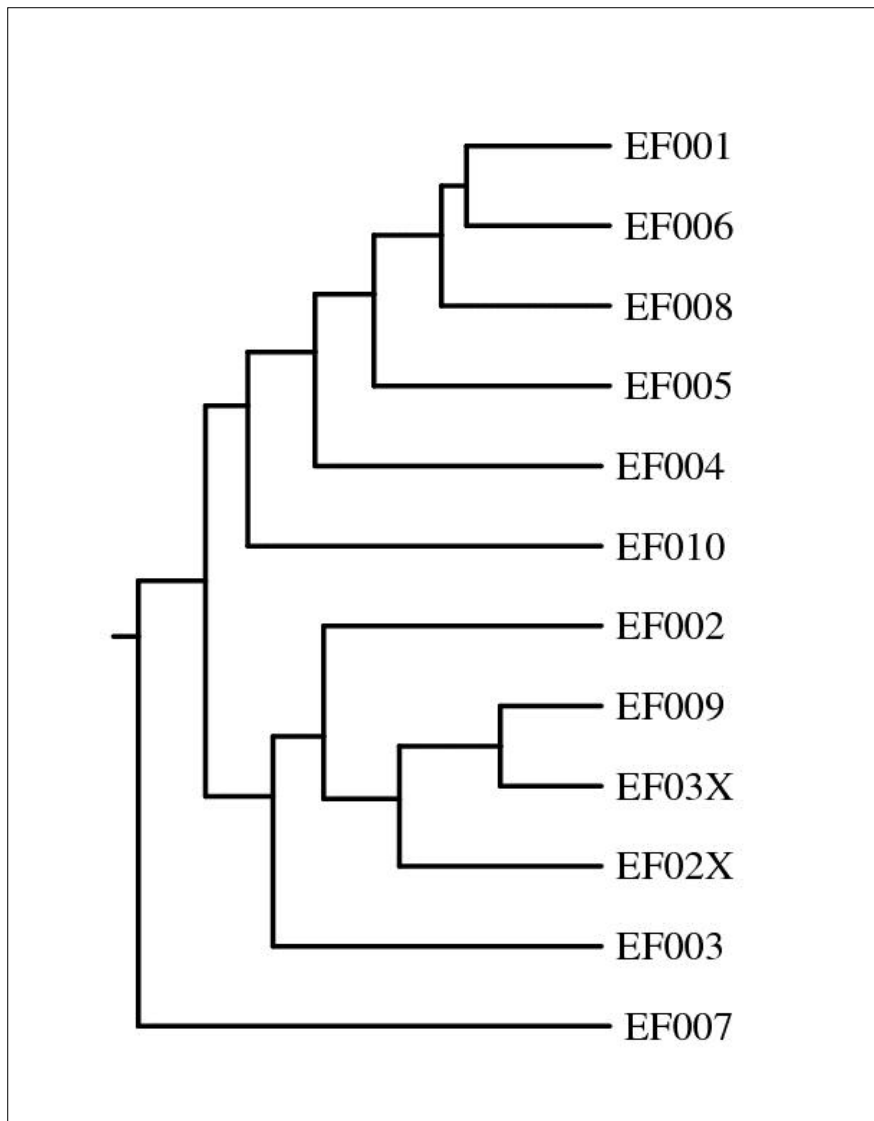

221

222

223 Fig. 1.0: Phenogram of 12 *E. fuscoguttatus* OTU's resulting from the UPGMA cluster

224 analysis of the OTU x OTU correlation matrix. Cluster 1 comprises EF001, EF006, EF008,

225 EF005, EF004 and EF010. Cluster 2 consists of EF002, EF009, EF003X, EF002X and

226 EF003. Cluster 3 is composed on only one individual EF007.

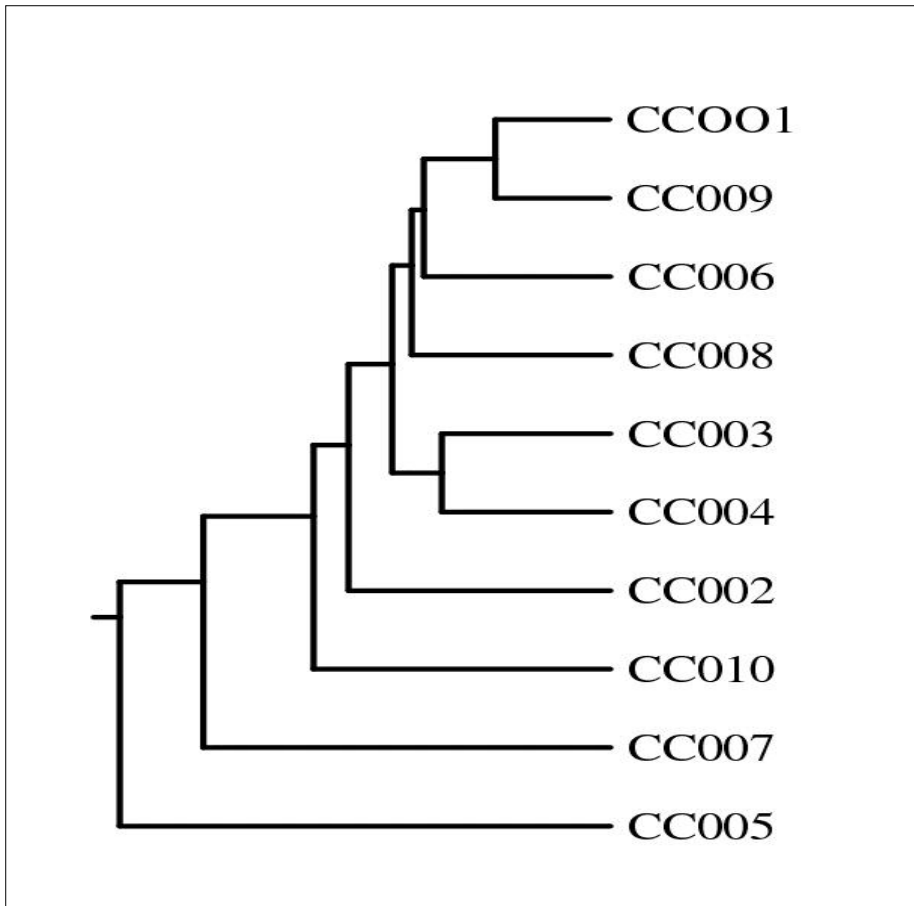

227

228 Figure 2.0: Phenogram of 10 *E. corallicola* OTU's resulting from the UPGMA cluster  
229 analysis of the OTU x OTU correlation matrix. The high degree of intraspecific genetic  
230 diversity is evident from the distribution of the nodes.

231

232

233

234

235

236

237

238

239

240 **REFERENCES**

- 241 [1] **Liu, Z. J. and Cordes, J. F.** 2004 DNA marker technologies and their application in  
242 aquaculture genetics. *Aquaculture* 238: 1 – 37.
- 243 [2] **Davis, G.P. and Hetzel, D.J.** 2000. Integrating molecular genetic technology with  
244 traditional approaches for genetic improvement in aquaculture species. *Aquaculture*  
245 *Research*, 31: 3 – 10. (DOI: 10.1046/j.1365-2109.2000.00438.x)
- 246 [3] **Sakamoto, T., Danzmann, R.G., Okamoto, N., Ferguson, M.M. and Ihssen, P.E.**  
247 1999. Linkage analysis of quantitative trait loci associated with spawning time in rainbow  
248 trout (*Oncorhynchus mykiss*). *Aquaculture*, 173: 33 – 43.
- 249 [4] **Fuji, K., Hasegawa, O., Honda, K., Kumasaka, K., Sakamoto, T. and Okamoto, N.**  
250 **2007.** Marker-assisted breeding of a lymphocystis disease-resistant Japanese flounder  
251 (*Paralichthys olivaceus*). *Aquaculture*, 272: 291 – 295.
- 252 [5] **Kocher, T.D., Lee, W.J., Sobolewska, H., Penman, D. and McAndrew, B.** 1998. A  
253 genetic linkage map of a cichlid fish, the tilapia (*Oreochromis niloticus*). *Genetics*, 148: 1225  
254 – 1232.
- 255 [6] **Waldbieser, G.C., Bosworth, B.G., Nonneman, D.J. and Wolters, W.R.** 2001. A  
256 microsatellite-based genetic linkage map for channel catfish, *Ictalurus punctatus*. *Genetics*,  
257 158: 727 – 734.
- 258 [7] **Gilbey, J., Verspoor, E., McLay, A. and Houlihan, D.** 2004. A microsatellite linkage  
259 map for Atlantic salmon (*Salmo salar*). *Animal genetics*, 35: 98 – 105.
- 260 [8] **Sun, X. and Liang, L.** 2004. A genetic linkage map of common carp (*Cyprinus carpio*  
261 L.) and mapping of a locus associated with cold tolerance. *Aquaculture*, 238: 165 – 172.
- 262 [9] **Magoulas, A., Bartley, D. and Basurco, B.** 1998. Application of molecular markers to  
263 aquaculture and broodstock management with special emphasis on microsatellite DNA.  
264 *Cahiers Options Mediterranes*, 34: 153 – 168.

- 265 [10] **Hayes, B., Laerdahl, J.K., Lien, S., Moen, T., Berg, P., Hindar, K., Davidson, W.S.,**  
266 **Koop, B.F., Adzhubei, A. and Høyheim, B.** 2007. An extensive resource of single  
267 nucleotide polymorphism markers associated with Atlantic salmon (*Salmo salar*) expressed  
268 sequences. *Aquaculture*, 265: 82 – 90.
- 269 [11] **Liu, Y.G., Chen, S.L., Li, B.F., Wang, Z.J. and Liu, Z.** 2005. Analysis of genetic  
270 variation in selected stocks of hatchery flounder, *Paralichthys olivaceus*, using AFLP  
271 markers. *Biochemical systematics and ecology*, 33: 993 – 1005.
- 272 [12] **Maltagliati, F., Lai, T., Casu, M., Valdesalici, S. and Castelli, A.** 2006. Identification  
273 of endangered Mediterranean cyprinodontiform fish by means of DNA inter-simple sequence  
274 repeats (ISSRs). *Biochemical systematics and ecology*, 34: 626 – 634.
- 275 [13] **Ferguson, M.M. and Danzmann, R.G.** 1998. Role of genetic markers in fisheries and  
276 aquaculture: useful tools or stamp collecting? *Canadian Journal of Fisheries and Aquatic*  
277 *Sciences*, 55: 1553 – 1563.
- 278 [14] **Karl, S.A. and Avise, J.C.** 1993. PCR-based assays of mendelian polymorphisms from  
279 anonymous single-copy nuclear DNA: techniques and applications for population genetics.  
280 *Molecular Biology and Evolution*, 10: 342 – 361.
- 281 [15] **Sambrook, J., Fritsch, E.F. and Maniatis, T.** 1989. *Molecular cloning* (Vol. 2, pp. 14-  
282 9). New York: Cold spring harbor laboratory press.
- 283 [16] **Rozen, S. and Skaletsky, H.** 1999. Primer3 on the WWW for general users and for  
284 biologist programmers. In *Bioinformatics methods and protocols* (pp. 365-386). Humana  
285 Press.
- 286 [17] **Garcia-Vallve, S. and Puigbo, P.** 2009. DendroUPGMA: A dendrogram construction  
287 utility. *Universitat Rovira i Virgili*.
- 288 [18] **Rohlf, F.J. and Sokal, R.R.** 1962. The description of taxonomic relationships by factor  
289 analysis. *Systematic Zoology*, 11: 1 – 16.

- 290 [19] **Jordan, G.E. and Piel, W.H.** 2008. PhyloWidget: web-based visualizations for the tree  
291 of life. *Bioinformatics*, 24: 1641 – 1642.
- 292 [20] **Gao, C., Wang, L., Fan, B., Yang, S., Meng, Z. and Lin, H.** 2012. Isolation and  
293 Characterization of Microsatellite Markers from the Brown-marbled Grouper, *Epinephelus*  
294 *fuscoguttatus*. *Journal of the World Aquaculture Society*, 43: 442 – 446.
- 295 [21] **Zhu, Z.Y., Lo, L.C., Lin, G., Xu, Y.X. and Yue, G.H.** 2005. Isolation and  
296 characterization of polymorphic microsatellites from red coral grouper (*Plectropomus*  
297 *maculatus*). *Molecular Ecology Notes*, 5: 579 – 581.
- 298 [22] **Dor, L., Shirak, A., Gorshkov, S., Band, M.R., Korol, A., Ronin, Y., Curzon, A.,**  
299 **Hulata, G., Seroussi, E. and Ron, M.** 2014. Construction of a microsatellites-based linkage  
300 map for the white grouper (*Epinephelus aeneus*). *G3: Genes| Genomes| Genetics*, 4: 1455 –  
301 1464.
- 302 [23] **You, X., Shu, L., Li, S., Chen, J., Luo, J., Lu, J., Mu, Q., Bai, J., Xia, Q., Chen, Q. and**  
303 **Cai, Y.** 2013. Construction of high-density genetic linkage maps for orange-spotted grouper  
304 *Epinephelus coioides* using multiplexed shotgun genotyping. *BMC genetics*, 14: 113.
- 305 [24] **Ramirez, M.A., Patricia-Acevedo, J., Planas, S., Carlin, J.L., Funk, S.M. and**  
306 **McMillan, W.** 2006. New microsatellite resources for groupers (Serranidae). *Molecular*  
307 *Ecology Notes*, 6: 813 – 817.
- 308 [25] **Govindaraju, G.S. and Jayasankar, P.** 2004. Taxonomic relationship among seven  
309 species of groupers (genus *Epinephelus*; family Serranidae) as revealed by RAPD  
310 fingerprinting. *Marine Biotechnology*, 6: 229 – 237. (DOI: 10.1007/s10126-003-0021-9)
- 311
- 312
- 313
- 314

315 **Table 1.0:** Molecular markers developed for genotyping of *E. fuscoguttatus* indicating the genomic locus, GenBank accession number, primer  
 316 designation, sequences of forward and reverse primers, expected product size and annealing temperatures.

| No. | Genomic Locus | GenBank Accession No. | Primer designation | Primer Sequences<br>5' – 3' | Expected Product Size (bp) | Annealing Temperature Ta (°C) |
|-----|---------------|-----------------------|--------------------|-----------------------------|----------------------------|-------------------------------|
| 1   | EFJ002A       | JN048832              | EFJ002F            | TTG GGA TGG GGT CTA AGA GA  | 294                        | 58                            |
|     |               |                       | EFJ002R            | ACC CCA GGT TTC TTT TCA GC  |                            |                               |
| 2   | EFJ005        | JN048835              | EFJ005F            | TTT CGT TGT AGC GCT TGA TG  | 345                        | 58                            |
|     |               |                       | EFJ005R            | TGC ACA CTC TTG GCA TTC TC  |                            |                               |
| 3   | EFJ006        | JN048836              | EFJ006F            | CGT CTC TCC ACG GGA TAT TT  | 253                        | 55                            |
|     |               |                       | EFJ006R            | CCG TGA CAA CTT TGA CCA TC  |                            |                               |
| 4   | EFJ016        | JN048846              | EFJ016F            | GGG CAG CAT TAT GTC TCC AT  | 185                        | 58                            |
|     |               |                       | EFJ016R            | TGT CTG TCC CTC CCT ACA CC  |                            |                               |
| 5   | EFJ018A       | JN048848              | EFJ018F            | CCT GTC TCT GGA AGC CTC AC  | 157                        | 58                            |
|     |               |                       | EFJ018R            | CCT GCA ACG TAG TGT GGG TA  |                            |                               |
| 6   | EFJ022        | JN048852              | EFJ022F            | ATG TGC CAT GCA ATC TGT GT  | 332                        | 58                            |
|     |               |                       | EFJ022R            | ACT GCT GTC CAT CCA TCT CC  |                            |                               |
| 7   | EFP007        | JN048861              | EFP007F            | GAA GTA TGG GGG CAA TGA TG  | 624                        | 58                            |
|     |               |                       | EFP007R            | TTT TTG TGG GGC TTT GCT AC  |                            |                               |
| 8   | EFP009        | JN048863              | EFP009F            | GCT GAG TGA TCT GGC ATC AA  | 178                        | 58                            |
|     |               |                       | EFP009R            | ATG CTC CAG AAG ACG AGG AA  |                            |                               |
| 9   | EFP010        | JN048864              | EFP010F            | CAT GGC AGC AGA ATA AAC CA  | 192                        | 58                            |
|     |               |                       | EFP010R            | CAG GAA GAG GGG AAG AAG TG  |                            |                               |

|    |          |          |           |                            |     |    |
|----|----------|----------|-----------|----------------------------|-----|----|
| 10 | EFP013   | JN048867 | EFP013F   | ACG GAC CTC TGG GAG AAA CT | 379 | 59 |
|    |          |          | EFP013R   | GAT GTC CCA GAA AGG CAA AA |     |    |
| 11 | EFPHI003 | JN159896 | EFPHI003F | ACA AGG CCA AAG CAA AGA GA | 550 | 58 |
|    |          |          | EFPHI003R | GGG TGG AGG AAG AAC ACA AA |     |    |
| 12 | EFPHI004 | JN159897 | EFPHI004F | TTT GTC TCC CTC CCT CAA TG | 265 | 58 |
|    |          |          | EFPHI004R | GCT AGC ATG ATC CCG ATG TT |     |    |
| 13 | EFPHI006 | JN159899 | EFPHI006F | CTA GCT GTG GCA GAC AGA CG | 214 | 58 |
|    |          |          | EFPHI006R | AGG GAC ACT GGT TGT GGA AC |     |    |
| 14 | EFJAAC2  | JN048828 | EFJAAC2F  | TGT GAA AAT GGG TGA AGT CG | 161 | 58 |
|    |          |          | EFJAAC2R  | GTA TGG CCC TGC AAA GGT AA |     |    |
| 15 | EFJCTT1  | JN048829 | EFJCTT1F  | TCC TGC ACA ACT CCA CAG AG | 288 | 58 |
|    |          |          | EFJCTT1R  | CAA GCA TGT CTG CCT TTT GA |     |    |
| 16 | EFJ003   | JN048833 | EFJ003F   | TTT GCA GTG TAG GCC AGA TG | 340 | 55 |
|    |          |          | EFJ003R   | GTA AGC AGG GCA AGG AAA AC |     |    |
| 17 | EFJ007   | JN048837 | EFJ007F   | AAG ATC GCT GGA GAC CAG AA | 288 | 55 |
|    |          |          | EFJ007R   | AAT CGT CAG TCG CTT CAC CT |     |    |
| 18 | EFJ008   | JN048838 | EFJ008F   | GGG GAA GCT CTG TCT GAA AA | 173 | 55 |
|    |          |          | EFJ008R   | TTC ATT CTG TCC CCA GAA CC |     |    |
| 19 | EFJ009   | JN048839 | EFJ009F   | GCA AAC TCT GCA CTC ACC AG | 203 | 55 |
|    |          |          | EFJ009R   | TCT GGG ATG CCT ACG TGA AT |     |    |
| 20 | EFJ013   | JN048843 | EFJ013F   | GCA CCT TGA GGG AGC TAG TG | 244 | 55 |
|    |          |          | EFJ013R   | GTC AGC AGA AGC CAC TTT CC |     |    |
| 21 | EFJ020   | JN048850 | EFJ020F   | TCA GTG ACC CCT GTG TGT GT | 372 | 55 |
|    |          |          | EFJ020R   | GTG CTT GTT TTT GCC ACT GA |     |    |



|    |          |          |            |                             |     |    |
|----|----------|----------|------------|-----------------------------|-----|----|
| 22 | EFJ021   | JN048851 | EFJ021F    | GTC ACA ACA CTG GGA ACG TG  | 476 | 55 |
|    |          |          | EFJ021R    | GGC AGC CAT GGT TTA TGT CT  |     |    |
| 23 | EFP003   | JN048857 | EFP003F    | TCA TCT AAT GTG CGC TGC TC  | 185 | 55 |
|    |          |          | EFP003R    | TGC TGT TAA TGC GTG AGG AC  |     |    |
| 24 | EFP005   | JN048859 | EFP005F    | AGA GCG GAG CTT GTT CTC AC  | 358 | 55 |
|    |          |          | EFP005R    | GAG TGT GCC TGC ATG AGT GT  |     |    |
| 25 | EFP006   | JN048860 | EFP006F    | AGC ACG TTT GAG CAG GAG AT  | 466 | 55 |
|    |          |          | EFP006R    | CAG GGA GGG TCA AGA TTT CA  |     |    |
| 26 | EFPHI002 | JN159895 | EFPHI002F  | AGA GGC TGG CTG TGT CAA CT  | 217 | 55 |
|    |          |          | EFPHI002R  | AAA CAT CCC ATC AGG CTG TT  |     |    |
| 27 | EFJAAC1  | JN048827 | EFJAAC1F   | CAT CGT GGT ATG CAC CTC TG  | 285 | 55 |
|    |          |          | EFJAAC1R   | TCA AAC AGG TCG TCC ACA AA  |     |    |
| 28 | EFPHI001 | JN159894 | EFPHI001BF | GTT CAG ACG TGC TCA GCG TA  | 189 | 58 |
|    |          |          | EFPHI001BR | TTA GTA AAC GCA CGC TGG TG  |     |    |
| 29 | EFJ014   | JN048844 | EFJ014AF   | ACT GCG ACA TCG TAT CGT GA  | 119 | 60 |
|    |          |          | EFJ014AR   | GGC CTT TAC AGC ACT GAG ATG |     |    |
| 30 | EFP012   | JN048866 | EFP012AF   | AAT GGC CAG ACT GGT TCA AG  | 112 | 62 |
|    |          |          | EFP012AR   | CAA GGT TGG ACG TGT TGT TG  |     |    |
| 31 | EFEH001  | JN944339 | EFEH001B1F | AAA GAG CCC GTT CTG TCT CA  | 111 | 58 |
|    |          |          | EFEH001B1R | GGG GGT GTT GAT GCT GTA AA  |     |    |
| 32 | EFEX002  | JN944340 | EFEX002YBF | TTG AGT GTG CTT GCT GAT CC  | 147 | 62 |
|    |          |          | EFEX002YBR | ATG CGA GCT CCA GGT AGA AA  |     |    |
| 33 | EFEX003  | JN944342 | EFEX003YBF | CCC AAA GTG CTG TTG CAG TA  | 142 | 58 |
|    |          |          | EFEX003YBR | TTC GCC AAG ATC TGG TA GC   |     |    |

|    |         |          |            |                            |     |    |
|----|---------|----------|------------|----------------------------|-----|----|
| 34 | EFHX003 | JN944347 | EFHX003YBF | GGG TTC GCT TGT CAC ACT TT | 243 | 58 |
|    |         |          | EFHX003YBR | GTG ACC TTT CCT CCA CCA GA |     |    |
| 35 | EFXB003 | JN944350 | EFXB003YBF | GCC TAA TAG CAT GCC AGG TG | 244 | 58 |
|    |         |          | EFXB003YBR | GCC CAA CAC AGG TCA GAA GT |     |    |
| 36 | EFXP001 | JN944352 | EFXP001YBF | CAA TGG ACT CAG GAC CTG CT | 114 | 60 |
|    |         |          | EFXP001YBR | ACG GTG GAT AAA CCA AGA CG |     |    |
| 37 | EFBP001 | JN944336 | EFBP001AF  | GAC CAA CAC CAA TCC AGT CC | 126 | 55 |
|    |         |          | EFBP001AR  | GAG ACG AGA ACC AGG ACA GC |     |    |
| 38 | EFEX001 | JN944340 | EFEX001AF  | CAG CCG ACC AAC ACT CAC TA | 344 | 55 |
|    |         |          | EFEX001AR  | CCT AGT GAC GCG AGG CTA TC |     |    |
| 39 | EFEX004 | JN944343 | EFEX004AF  | GGC CCG TGT CTC ACT ATG TT | 149 | 55 |
|    |         |          | EFEX004AR  | TGG GGG AAG ACA ACA CTT TC |     |    |
| 40 | EFEX005 | JN944344 | EFEX005AF  | CTT AGG CAG ACG GTG TGT GA | 288 | 55 |
|    |         |          | EFEX005AR  | CTG GGG GAG GTT TTA CGT TT |     |    |
| 41 | EFXB001 | JN944348 | EFXB001AF  | CTG CAT GCA CCT GAC AGA CT | 182 | 55 |
|    |         |          | EFXB001AR  | CAG GCA TTT GAT CTG GTC CT |     |    |
| 42 | EFXB003 | JN944350 | EFXB003AF  | CCA GAT GGC CTC AAA TCC TA | 400 | 55 |
|    |         |          | EFXB003AR  | TGT GAC TCT GCA GGA ACA GG |     |    |

317

318

319

320

321

322

323 Table 2.0: Intra-specific genetic profiling of *E. fuscoguttatus* broodstock collected from the wild. '1' indicates the presence of a PCR amplicon of  
 324 the expected product size, '0' indicate the absence of a PCR amplicon. Primers EFJ006, EFJ018, EFP010, EFJAAC2 and EFP003 yielded more  
 325 than one PCR amplicon and these were scored separately.

326

| No. | Genomic Locus | Observed Product Sizes (bp) | EF02X Control DNA | EF 001 | EF 002 | EF 003 | EF 004 | EF 005 | EF 006 | EF 007 | EF 008 | EF 009 | EF 0010 | EF 03X |
|-----|---------------|-----------------------------|-------------------|--------|--------|--------|--------|--------|--------|--------|--------|--------|---------|--------|
| 1   | EFJ002        | 294                         | 1                 | 1      | 0      | 0      | 1      | 1      | 1      | 1      | 1      | 1      | 1       | 1      |
| 2   | EFJ005        | 345                         | 1                 | 1      | 1      | 1      | 1      | 1      | 1      | 1      | 1      | 1      | 1       | 1      |
| 3   | EFJ006A       | 253                         | 1                 | 1      | 1      | 0      | 1      | 1      | 1      | 1      | 1      | 1      | 1       | 1      |
| 3a  | EFJ006B       | ~200                        | 0                 | 1      | 1      | 1      | 1      | 1      | 1      | 1      | 1      | 1      | 1       | 0      |
| 4   | EFJ016        | 185                         | 1                 | 1      | 1      | 1      | 1      | 1      | 1      | 1      | 1      | 1      | 1       | 1      |
| 5   | EFJ018A       | 157                         | 1                 | 1      | 1      | 1      | 0      | 0      | 1      | 1      | 0      | 1      | 1       | 1      |
| 5b  | EFJ018B       | ~180                        | 0                 | 1      | 0      | 0      | 1      | 1      | 1      | 0      | 1      | 0      | 0       | 0      |
| 6   | EFJ022        | 332                         | 1                 | 1      | 1      | 1      | 1      | 1      | 1      | 1      | 1      | 1      | 1       | 1      |
| 7   | EFP007        | 624                         | 1                 | 1      | 1      | 0      | 1      | 1      | 1      | 0      | 1      | 1      | 1       | 1      |
| 8   | EFP009        | 178                         | 1                 | 1      | 1      | 1      | 1      | 1      | 1      | 1      | 1      | 1      | 1       | 0      |
| 9   | EFP010A       | 192                         | 1                 | 1      | 1      | 1      | 1      | 1      | 1      | 1      | 1      | 1      | 1       | 1      |
| 9a  | EFP010B       | ~210                        | 0                 | 1      | 1      | 1      | 1      | 1      | 1      | 1      | 1      | 1      | 1       | 1      |
| 9b  | EFP010C       | ~270                        | 0                 | 1      | 0      | 0      | 0      | 0      | 0      | 0      | 1      | 0      | 1       | 0      |
| 10  | EFP013        | 379                         | 1                 | 1      | 1      | 1      | 1      | 1      | 1      | 1      | 1      | 1      | 1       | 1      |
| 11  | EFPHI003      | 550                         | 1                 | 1      | 1      | 1      | 1      | 1      | 1      | 1      | 1      | 1      | 1       | 1      |
| 12  | EFPHI004      | 265                         | 1                 | 1      | 1      | 1      | 1      | 1      | 1      | 1      | 1      | 1      | 1       | 1      |
| 13  | EFPHI006      | 214                         | 1                 | 1      | 1      | 1      | 1      | 1      | 1      | 1      | 1      | 1      | 1       | 1      |
| 14  | EFJAAC2A      | 161                         | 1                 | 1      | 1      | 1      | 1      | 0      | 0      | 0      | 0      | 1      | 0       | 1      |
| 14a | EFJAAC2B      | ~180                        | 0                 | 1      | 0      | 0      | 0      | 1      | 1      | 1      | 1      | 0      | 0       | 0      |

|     |          |       |       |       |       |       |       |       |       |       |       |       |       |       |
|-----|----------|-------|-------|-------|-------|-------|-------|-------|-------|-------|-------|-------|-------|-------|
| 15  | EFJCTT1  | 288   | 1     | 1     | 1     | 1     | 1     | 1     | 1     | 0     | 1     | 1     | 0     | 1     |
| 16  | EFJ003   | 340   | 1     | 1     | 1     | 1     | 1     | 1     | 1     | 1     | 1     | 1     | 1     | 1     |
| 17  | EFJ007   | 288   | 1     | 0     | 1     | 0     | 0     | 0     | 1     | 1     | 1     | 1     | 0     | 1     |
| 18  | EFJ008   | 173   | 1     | 1     | 1     | 1     | 1     | 1     | 1     | 1     | 1     | 1     | 1     | 1     |
| 19  | EFJ009   | 203   | 1     | 1     | 1     | 1     | 0     | 1     | 1     | 1     | 1     | 1     | 1     | 1     |
| 20  | EFJ013   | 244   | 1     | 1     | 1     | 1     | 1     | 1     | 1     | 1     | 1     | 1     | 1     | 1     |
| 21  | EFJ020   | 372   | 1     | 1     | 1     | 1     | 1     | 1     | 1     | 0     | 1     | 1     | 1     | 1     |
| 22  | EFJ021   | 476   | 1     | 1     | 1     | 1     | 1     | 1     | 1     | 0     | 1     | 1     | 1     | 1     |
| 23  | EFP003A  | 185   | 1     | 1     | 0     | 1     | 0     | 1     | 1     | 1     | 0     | 1     | 0     | 1     |
| 23a | EFP003B  | ~210  | 0     | 1     | 1     | 0     | 0     | 0     | 1     | 0     | 1     | 0     | 1     | 0     |
| 24  | EFP005   | 358   | 1     | 0     | 0     | 0     | 0     | 0     | 0     | 0     | 0     | 0     | 0     | 0     |
| 25  | EFP006   | 466   | 1     | 0     | 1     | 0     | 0     | 1     | 0     | 0     | 0     | 0     | 0     | 0     |
| 26  | EFPHI002 | 217   | 1     | 1     | 1     | 1     | 1     | 1     | 1     | 1     | 1     | 1     | 1     | 1     |
| 27  | EFJAAC1  | 285   | 1     | 1     | 1     | 1     | 1     | 1     | 1     | 1     | 1     | 1     | 1     | 1     |
| 28  | EFPHI001 | 189   | 1     | 1     | 1     | 1     | 1     | 1     | 1     | 1     | 1     | 1     | 1     | 1     |
| 29  | EFJ014   | 119   | 1     | 1     | 1     | 1     | 1     | 1     | 1     | 1     | 1     | 1     | 1     | 1     |
| 30  | EFP012   | 112   | 1     | 1     | 1     | 1     | 1     | 1     | 1     | 1     | 1     | 1     | 1     | 1     |
| 31  | EFEH001  | 111   | 1     | 1     | 1     | 1     | 1     | 1     | 1     | 1     | 1     | 1     | 1     | 1     |
| 32  | EFEX002  | 147   | 1     | 1     | 1     | 1     | 1     | 1     | 1     | 1     | 1     | 1     | 1     | 1     |
| 33  | EFEX003  | 142   | 1     | 1     | 1     | 1     | 1     | 1     | 1     | 1     | 1     | 1     | 1     | 1     |
| 34  | EFHX003  | 243   | 1     | 1     | 1     | 1     | 1     | 1     | 1     | 1     | 1     | 1     | 1     | 1     |
| 35  | EFXB003  | 244   | 1     | 1     | 1     | 1     | 1     | 1     | 1     | 1     | 1     | 1     | 1     | 1     |
| 36  | EFXP001  | 114   | 1     | 1     | 1     | 1     | 1     | 1     | 1     | 1     | 1     | 1     | 1     | 1     |
| 37  | EFBP001  | 126   | 1     | 1     | 1     | 1     | 1     | 1     | 1     | 1     | 1     | 1     | 1     | 1     |
| 38  | EFEX001  | 344   | 1     | 1     | 1     | 1     | 1     | 1     | 1     | 1     | 1     | 1     | 1     | 1     |
| 39  | EFEX004  | 149   | 1     | 1     | 1     | 1     | 1     | 1     | 1     | 1     | 1     | 1     | 1     | 1     |
| 40  | EFEX005  | 288   | 1     | 1     | 1     | 1     | 1     | 1     | 1     | 1     | 1     | 1     | 1     | 1     |
| 41  | EFXB001  | 182   | 1     | 1     | 1     | 1     | 1     | 1     | 1     | 1     | 1     | 1     | 1     | 1     |
| 42  | EFXB003  | 400   | 1     | 1     | 1     | 1     | 1     | 1     | 1     | 1     | 1     | 1     | 1     | 1     |
|     |          | TOTAL | 15/21 | 18/21 | 15/21 | 11/21 | 12/21 | 15/21 | 17/21 | 11/21 | 16/21 | 15/21 | 13/21 | 13/21 |

|  |                   |          |           |           |           |           |           |           |           |           |           |           |           |           |
|--|-------------------|----------|-----------|-----------|-----------|-----------|-----------|-----------|-----------|-----------|-----------|-----------|-----------|-----------|
|  |                   |          |           |           |           |           |           |           |           |           |           |           |           |           |
|  | <b>Similarity</b> | <b>%</b> | <b>71</b> | <b>86</b> | <b>71</b> | <b>52</b> | <b>57</b> | <b>71</b> | <b>81</b> | <b>52</b> | <b>76</b> | <b>71</b> | <b>62</b> | <b>62</b> |

327 Table 3.0: Molecular markers developed for genotyping of *E. corallicola* indicating the genomic locus, GenBank accession number, primer  
328 designation, sequences of forward and reverse primers, expected product size and annealing temperatures.

| <b>NO</b> | <b>Genomic Locus</b> | <b>GenBank Accession No.</b> | <b>Primer designation</b> | <b>Primer Sequences<br/>5' – 3'</b> | <b>Expected Product Size (bp)</b> | <b>Annealing Temperature Ta (°C)</b> |
|-----------|----------------------|------------------------------|---------------------------|-------------------------------------|-----------------------------------|--------------------------------------|
| 1         | CCBP001              | JX684019                     | CCBP001AF                 | GGT GTG AGA TGG GCT ACC AG          | 144                               | 58                                   |
|           |                      |                              | CCBP001AR                 | TTG CCT CAC AGA GTT TGC AC          |                                   |                                      |
| 2         | CCBP002              | JX684020                     | CCBP002AF                 | TCA TTC TTC CCT GGA AGA GG          | 178                               | 58                                   |
|           |                      |                              | CCBP002AR                 | CTG TTG AGC GTG TGT GTG TG          |                                   |                                      |
| 3         | CCBP003              | JX684021                     | CCBP003AF                 | TAG GCG TTC CCT GTG ATT GT          | 159                               | 58                                   |
|           |                      |                              | CCBP003AR                 | GCC CAA TAG CCA CAT GAA CT          |                                   |                                      |
| 4         | CCBP004              | JX684022                     | CCBP004AF                 | AAG ACG TGA TCC CTG TGG AC          | 155                               | 58                                   |
|           |                      |                              | CCBP004AR                 | TGG AGG CTG TTG AAA GAG GT          |                                   |                                      |
| 5         | CCBP005              | JX684023                     | CCBP005AF                 | TAA AGC CAC GTG AGT GTT CG          | 252                               | 58                                   |
|           |                      |                              | CCBP005AR                 | AGC GCC TAG CTC TAT GGT CA          |                                   |                                      |
| 6         | CCBP006              | JX684024                     | CCBP006AF                 | TAG CAA GGC AAG GCC TCT AA          | 264                               | 58                                   |
|           |                      |                              | CCBP006AR                 | CGG TCA AAC ACA CAC AGG AC          |                                   |                                      |
| 7         | CCBP007              | JX684025                     | CCBP007AF                 | GTG GTC TCG TGG GTG TTG TT          | 202                               | 58                                   |
|           |                      |                              | CCBP007AR                 | AGC CAG TCT CAG CAG AGG AA          |                                   |                                      |
| 8         | CCBP008              | JX684026                     | CCBP008AF                 | GGT TGC CAA AGA AAC TGC TC          | 213                               | 58                                   |
|           |                      |                              | CCBP008AR                 | TCC TCC AGG TCT TGC TCT GT          |                                   |                                      |

|    |         |          |           |                            |     |    |
|----|---------|----------|-----------|----------------------------|-----|----|
| 9  | CCBP009 | JX684027 | CCBP009AF | GAG AAG GGT TCA TTG GTG GA | 242 | 58 |
|    |         |          | CCBP009AR | ACG GCC AGT TTA ATG TCA GC |     |    |
| 10 | CCBH001 | JX684028 | CCBH001AF | GGA CAC AGC CAG GTT TCA GT | 225 | 58 |
|    |         |          | CCBH001AR | CCC CCG ACC ACC TAA ATT AT |     |    |
| 11 | CCBH002 | JX684029 | CCBH002AF | TCC CTG CCT CTC TGT TCA CT | 272 | 58 |
|    |         |          | CCBH002AR | CAT TTC CCC CTC CTT CTC TC |     |    |
| 12 | CCBH003 | JX684030 | CCBH003AF | GGG ACA GGT GAG GCT AAC AT | 234 | 58 |
|    |         | 31323334 | CCBH003AR | CAG GGT CAG TTC ACC GTT TT |     |    |
| 13 | CCBH008 | JX684035 | CCBH008AF | CCA CAA AGA AAA GCC TGG AC | 288 | 58 |
|    |         |          | CCBH008AR | GTA ACA CTC GCC ACA CAT CG |     |    |
| 14 | CCBH009 | JX684036 | CCBH009AF | ACC GTG TCC ATC CCT TTA TG | 249 | 58 |
|    |         |          | CCBH009AR | GCT TCA CAA TGA GCC ACA GA |     |    |
| 15 | CCBH010 | JX684037 | CCBH010AF | CCC TAT TGG CCT CAC TTT CA | 291 | 58 |
|    |         |          | CCBH010AR | ACT TCC GTT GTC CCA CTG TC |     |    |
| 16 | CCBH011 | JX684038 | CCBH011AF | CCA GTG CCC AAA CCT AGA AG | 228 | 58 |
|    |         |          | CCBH011AR | TGG TCT CCA GAG CTG AGG TT |     |    |
| 17 | CCBH012 | JX684039 | CCBH012AF | GAC ATG GTC ACA CCA ACA GC | 210 | 58 |
|    |         |          | CCBH012AR | GGC GAA CTT ATT GGA CCG TA |     |    |
| 18 | CCBH013 | JX684040 | CCBH013AF | CTG GCT CCC TGT AAA ATC CA | 276 | 58 |
|    |         |          | CCBH013AR | GGA GAG CCC TGA TAG CTG AA |     |    |
| 19 | CCBH014 | JX684041 | CCBH014AF | CTT TCC TTA CAG GCC CAT CA | 114 | 58 |
|    |         |          | CCBH014AR | GTG CCC CAC CAT CAA ATA TC |     |    |
| 20 | CCBH015 | JX684042 | CCBH015AF | CAA AAA CCG CTA GAG GTC CA | 245 | 58 |
|    |         |          | CCBH015AR | AAC CAG GAT CTC GAT TGC AG |     |    |

|    |         |          |           |                            |     |    |
|----|---------|----------|-----------|----------------------------|-----|----|
| 21 | CCBS001 | JX684044 | CCBS001AF | GAC GTC AGC ACT CGG AAG TT | 204 | 58 |
|    |         |          | CCBS001AR | CGA GAG TCC CAT TCC GAC TA |     |    |
| 22 | CCBS002 | JX684044 | CCBS002AF | GAC GGA GCA GTG AGT GAC AA | 344 | 58 |
|    |         |          | CCBS002AR | GCG TGT TTC CAT CCA CTA CA |     |    |
| 23 | CCBS004 | JX684046 | CCBS004AF | TGG TTC TTC CCA TAG GCA AC | 312 | 58 |
|    |         |          | CCBS004AR | CGG GAC CAG ATT TTA CGA GA |     |    |
| 24 | CCBS005 | JX684047 | CCBS005AF | GGC TCA AGC GTC AGA TCT TC | 209 | 58 |
|    |         |          | CCBS005AR | ACT TTC TGT GCA GCA TGT CG |     |    |
| 25 | CCEB001 | JX684048 | CCEB001AF | GTG TGA ACA TGC CCT GAT TG | 305 | 58 |
|    |         |          | CCEB001AR | CCG ATG TGC TGG AGT ACA GA |     |    |
| 26 | CCEB002 | JX684049 | CCEB002AF | GAA ACA CGA GCA GAG CTG AA | 319 | 58 |
|    |         |          | CCEB002AR | CGG GTC TCA TCC AAG AGA AA |     |    |
| 27 | CCEB003 | JX684050 | CCEB003AF | TAA GCG AGG GGC ATC TAT TG | 214 | 58 |
|    |         |          | CCEB003AR | CTG TTT GAT GGG ACA CAT GC |     |    |
| 28 | CCEB004 | JX684051 | CCEB004AF | GCC GAG AGT AAC ACG GAA AA | 309 | 58 |
|    |         |          | CCEB004AR | GCT AAC ATG GGT GGG ACA TT |     |    |
| 29 | CCEB005 | JX684052 | CCEB005AF | CTC CCT GGC TAG CAC GTT TA | 216 | 58 |
|    |         |          | CCEB005AR | TTG CTG AGT GGC GTG TAA TC |     |    |
| 30 | CCEB006 | JX684053 | CCEB006AF | AAA GGC TAT GCG AGA CTG GA | 225 | 58 |
|    |         |          | CCEB006AR | CGC AAG GGT AAA CAG GTG AT |     |    |
| 31 | CCEB008 | JX684055 | CCEB008AF | CAT GCT CCT GAT GTG CCT TA | 380 | 58 |
|    |         |          | CCEB008AR | TAT GTC AGC CAT GTC CGT GT |     |    |
| 32 | CCEH002 | JX684057 | CCEH002AF | GAG GCG GTT TTG ACT GTG AT | 222 | 58 |
|    |         |          | CCEH002AR | AAT CGA CCG TCC ACT TTG TC |     |    |

|    |         |          |           |                            |     |    |
|----|---------|----------|-----------|----------------------------|-----|----|
| 33 | CCEH003 | JX684058 | CCEH003AF | GTG GTG TGT GAG GTG ATC CT | 338 | 58 |
|    |         |          | CCEH003AR | TGA CCG CAC AAA CTA AGC TG |     |    |
| 34 | CCEH004 | JX684059 | CCEH004AF | TGA GTG CTT GGA CTT TGT GC | 389 | 58 |
|    |         |          | CCEH004AR | GGG CTC TCA ACC TGA ATC AA |     |    |
| 35 | CCSP001 | JX684060 | CCSP001AF | TTT GCT GCC ACA CTT GAG AC | 255 | 58 |
|    |         |          | CCSP001AR | CCC CAT CAG GCA ATG TTT AG |     |    |
| 36 | CCSP004 | JX684063 | CCSP004AF | ATT TCC AGA CTG GGT GTT GC | 284 | 58 |
|    |         |          | CCSP004AR | TGG AGC ATA GCT GTC ACC AG |     |    |
| 37 | CCSP005 | JX684064 | CCSP005AF | TAG TTG TTG ACG GGC CTC TT | 249 | 58 |
|    |         |          | CCSP005AR | CCT GGC CAT TCT TAT CGA TG |     |    |
| 38 | CCSP006 | JX684065 | CCSP006AF | TTC AGC CCG TCT CAG ACT TT | 298 | 58 |
|    |         |          | CCSP006AR | TCT CCC CTC AGC TTA CAT GG |     |    |
| 39 | CCSP007 | JX684066 | CCSP007AF | ACC AGG AAG CCC AGA AAA T  | 286 | 58 |
|    |         |          | CCSP007AR | GGG AGT GCT TAG CAG AAT CG |     |    |
| 40 | CCHX002 | JX684067 | CCHX002AF | GCT ATG AAC GCA GGT CAA CA | 230 | 58 |
|    |         |          | CCHX002AR | CCT GCT GTA CGT GTC ATG CT |     |    |
| 41 | CCXP001 | JX684068 | CCXP001AF | ACT GGT GTT CAT CCG TAG CC | 252 | 58 |
|    |         |          | CCXP001AR | AAG GGG CCA ATT TAG TAC CC |     |    |

329

330

331

332



333

334 **Table 4.0:** Intra-specific genetic profiling of *E. corallicola* broodstock collected from the wild. '1' indicates the presence of a PCR amplicon of  
 335 the expected product size, '0' indicate the absence of a PCR amplicon.

336

| NO | Genomic Locus | Observed Product Size (bp) | CC001 Control | CC 002 | CC 003 | CC 004 | CC 005 | CC 006 | CC 007 | CC 008 | CC 009 | CC 010 |
|----|---------------|----------------------------|---------------|--------|--------|--------|--------|--------|--------|--------|--------|--------|
| 1  | CCBP001       | 144                        | 1             | 0      | 1      | 1      | 0      | 1      | 0      | 1      | 0      | 0      |
| 2  | CCBP002       | 178                        | 1             | 0      | 1      | 0      | 0      | 1      | 0      | 0      | 0      | 0      |
| 3  | CCBP003       | 159                        | 1             | 1      | 1      | 1      | 0      | 1      | 0      | 0      | 1      | 0      |
| 4  | CCBP004       | 155                        | 1             | 0      | 1      | 1      | 0      | 1      | 0      | 0      | 1      | 0      |
| 5  | CCBP005       | 252                        | 1             | 0      | 0      | 0      | 1      | 0      | 0      | 0      | 0      | 0      |
| 6  | CCBP006       | 264                        | 1             | 1      | 0      | 0      | 0      | 1      | 0      | 0      | 1      | 0      |
| 7  | CCBP007       | 202                        | 1             | 0      | 0      | 0      | 0      | 1      | 0      | 0      | 1      | 0      |
| 8  | CCBP008       | 213                        | 1             | 0      | 1      | 0      | 0      | 0      | 0      | 0      | 1      | 0      |
| 9  | CCBP009       | 242                        | 1             | 0      | 1      | 0      | 0      | 0      | 0      | 1      | 1      | 0      |
| 10 | CCBH001       | 225                        | 1             | 1      | 1      | 1      | 0      | 0      | 0      | 0      | 0      | 0      |
| 11 | CCBH002       | 272                        | 1             | 1      | 0      | 0      | 0      | 1      | 0      | 1      | 1      | 1      |
| 12 | CCBH003       | 234                        | 1             | 0      | 1      | 0      | 0      | 0      | 0      | 1      | 1      | 0      |
| 13 | CCBH008       | 288                        | 1             | 0      | 0      | 0      | 0      | 0      | 0      | 1      | 0      | 0      |
| 14 | CCBH009       | 249                        | 1             | 0      | 0      | 0      | 0      | 1      | 0      | 1      | 1      | 0      |
| 15 | CCBH010       | 291                        | 1             | 0      | 0      | 0      | 0      | 0      | 1      | 0      | 0      | 0      |

|    |         |     |   |   |   |   |   |   |   |   |   |   |
|----|---------|-----|---|---|---|---|---|---|---|---|---|---|
| 16 | CCBH011 | 228 | 1 | 0 | 1 | 0 | 0 | 1 | 1 | 1 | 1 | 1 |
| 17 | CCBH012 | 210 | 1 | 0 | 1 | 0 | 0 | 0 | 0 | 0 | 1 | 0 |
| 18 | CCBH013 | 276 | 1 | 0 | 1 | 1 | 0 | 0 | 0 | 0 | 1 | 1 |
| 19 | CCBH014 | 114 | 1 | 0 | 1 | 1 | 0 | 1 | 1 | 0 | 1 | 0 |
| 20 | CCBH015 | 245 | 1 | 0 | 0 | 0 | 0 | 0 | 0 | 0 | 1 | 0 |
| 21 | CCBS001 | 204 | 1 | 0 | 0 | 0 | 0 | 1 | 0 | 0 | 1 | 0 |
| 22 | CCBS002 | 344 | 1 | 0 | 0 | 0 | 0 | 1 | 0 | 1 | 0 | 0 |
| 23 | CCBS004 | 312 | 1 | 0 | 0 | 0 | 0 | 0 | 0 | 1 | 0 | 0 |
| 24 | CCBS005 | 209 | 1 | 0 | 0 | 0 | 0 | 0 | 0 | 1 | 1 | 0 |
| 25 | CCEB001 | 305 | 1 | 0 | 0 | 0 | 0 | 0 | 0 | 1 | 1 | 1 |
| 26 | CCEB002 | 319 | 1 | 0 | 0 | 0 | 0 | 0 | 0 | 1 | 0 | 0 |
| 27 | CCEB003 | 214 | 1 | 0 | 0 | 0 | 0 | 1 | 1 | 1 | 1 | 1 |
| 28 | CCEB004 | 309 | 1 | 0 | 1 | 0 | 0 | 1 | 1 | 1 | 1 | 0 |
| 29 | CCEB005 | 216 | 1 | 1 | 1 | 1 | 1 | 1 | 1 | 0 | 1 | 0 |
| 30 | CCEB006 | 225 | 1 | 0 | 0 | 0 | 0 | 0 | 0 | 1 | 1 | 0 |
| 31 | CCEB008 | 380 | 1 | 1 | 1 | 1 | 0 | 1 | 0 | 1 | 1 | 0 |
| 32 | CCEH002 | 222 | 1 | 1 | 1 | 1 | 1 | 1 | 0 | 1 | 1 | 0 |
| 33 | CCEH003 | 338 | 1 | 1 | 1 | 0 | 0 | 0 | 0 | 1 | 1 | 1 |
| 34 | CCEH004 | 389 | 1 | 1 | 1 | 0 | 0 | 0 | 0 | 0 | 0 | 1 |
| 35 | CCSP001 | 255 | 1 | 1 | 1 | 1 | 1 | 1 | 1 | 0 | 1 | 1 |
| 36 | CCSP004 | 284 | 1 | 1 | 1 | 1 | 0 | 1 | 0 | 0 | 1 | 1 |
| 37 | CCSP005 | 249 | 1 | 1 | 1 | 1 | 0 | 1 | 1 | 0 | 1 | 1 |
| 38 | CCSP006 | 298 | 1 | 1 | 1 | 1 | 0 | 1 | 0 | 0 | 0 | 1 |
| 39 | CCSP007 | 286 | 1 | 0 | 0 | 0 | 0 | 0 | 0 | 0 | 1 | 0 |

|    |            |       |       |       |       |       |      |       |      |       |       |       |
|----|------------|-------|-------|-------|-------|-------|------|-------|------|-------|-------|-------|
| 40 | CCHX002    | 230   | 1     | 0     | 0     | 0     | 0    | 1     | 0    | 0     | 0     | 0     |
| 41 | CCHXP001   | 252   | 1     | 0     | 1     | 0     | 0    | 1     | 0    | 0     | 0     | 0     |
|    |            | TOTAL | 41/41 | 13/41 | 23/41 | 13/41 | 3/41 | 23/41 | 8/41 | 18/41 | 28/41 | 11/41 |
|    | Similarity | %     | 100   | 32    | 56    | 32    | 7    | 56    | 20   | 44    | 68    | 27    |

337

338
